# Supplementary material
Source: MDPI journal article supplement (https://www.mdpi.com/1911-8074/16/3/190)
Supplement: s1 [file s1]

## Article

# Supplementary File for Revisiting the Determinants of Consumption: Bayesian Model Averaging Approach

Pinar Deniz <sup>1,\*</sup> , Thanasis Stengos <sup>2</sup>

<sup>1</sup> Department of Economics, Marmara University, Istanbul 34722, Turkey; pinar.deniz@marmara.edu.tr

<sup>2</sup> Department of Economics, University of Guelph, Guelph, ON N1G 2W1, Canada; tstengos@uoguelph.ca

\* Correspondence: pinar.deniz@marmara.edu.tr

## Appendix C BMA analysis - Model Prior Comparisons

1

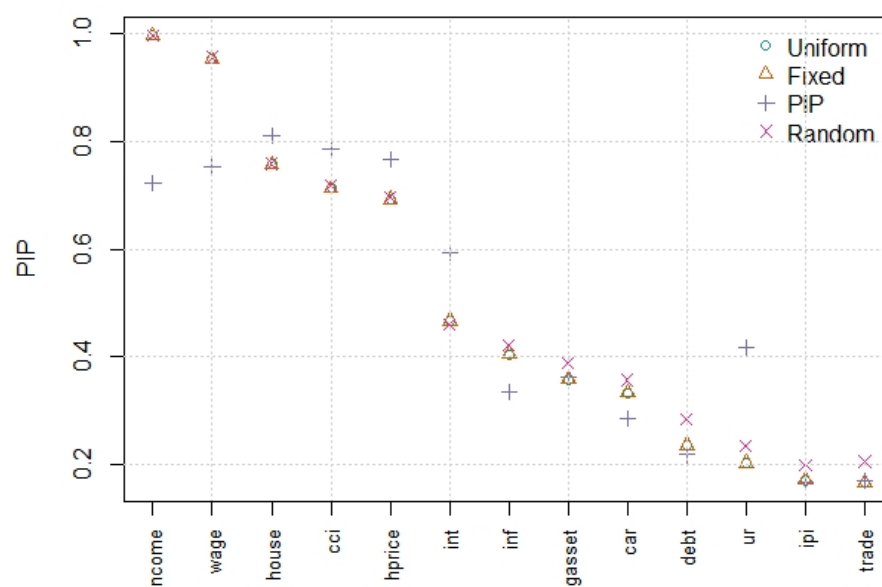

**Figure A1.** Model Prior Comparison - Club 1

Citation: Deniz, P.; Stengos, T. Title.

*Journal Not Specified* **2023**, *1*, 0.

<https://doi.org/>

Received:

Revised:

Accepted:

Published:

**Copyright:** © 2023 by the authors.

Submitted to *Journal Not Specified* for possible open access publication under the terms and conditions of the Creative Commons Attribution (CC BY) license (<https://creativecommons.org/licenses/by/4.0/>).

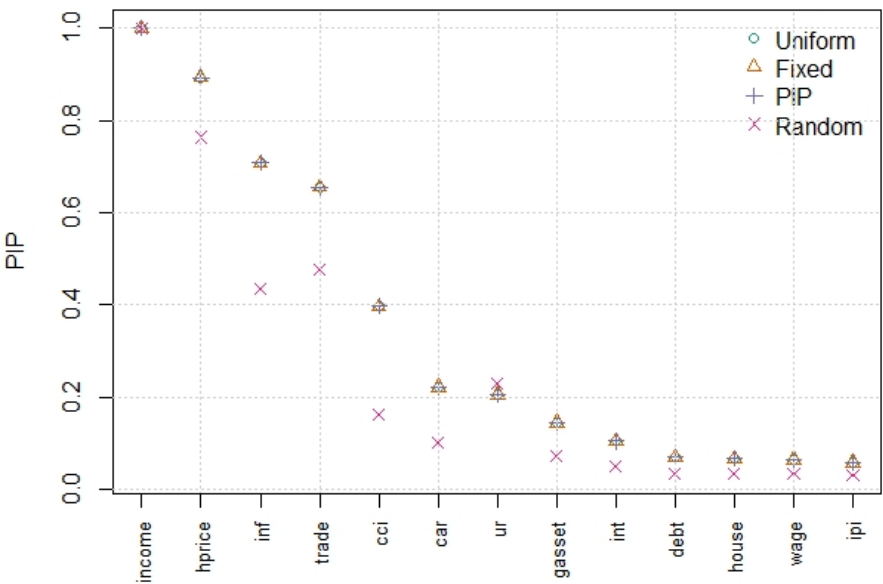

Figure A2. Model Prior Comparison - Club 2

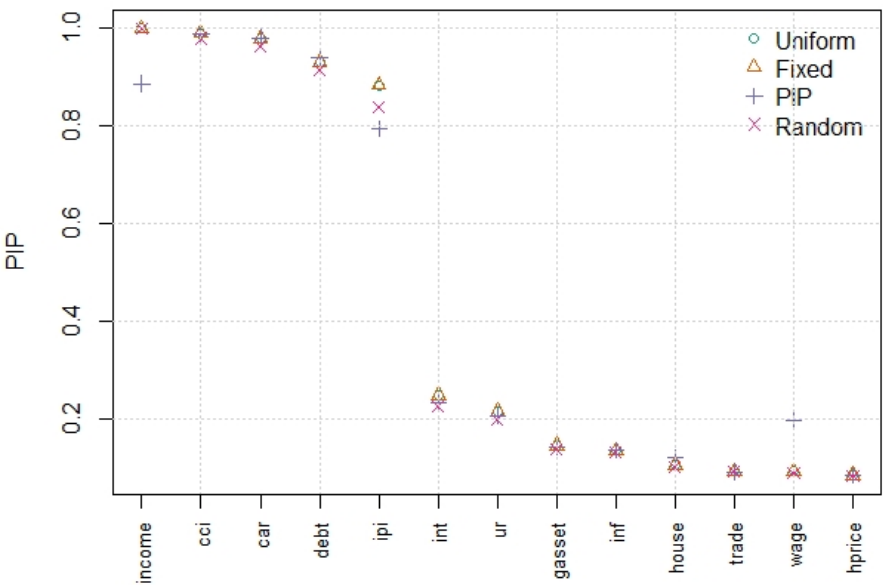

Figure A3. Model Prior Comparison - Club 3

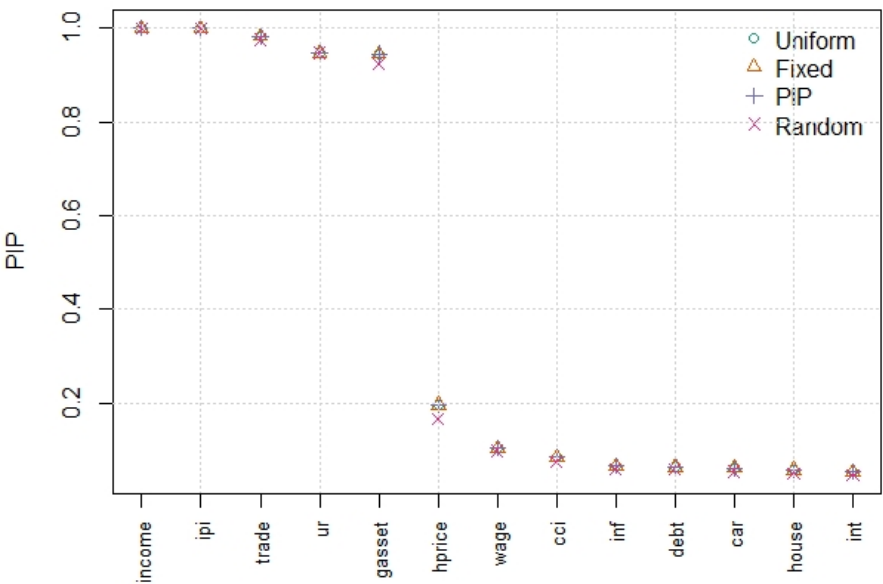

Figure A4. Model Prior Comparison - Club 4

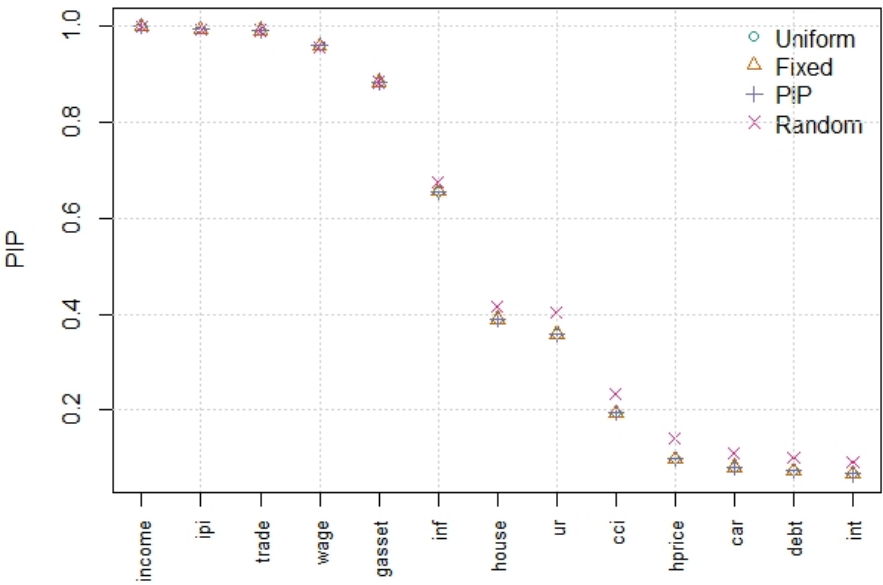

Figure A5. Model Prior Comparison - Club 5
