# Supplementary material
Source: MDPI journal article supplement (https://www.mdpi.com/1911-8074/16/3/190)
Supplement: s1 [file s1]

Article

# Supplementary File for Revisiting the Determinants of Consumption: A Bayesian Model Averaging Approach

Pinar Deniz <sup>1,\*</sup> , Thanasis Stengos <sup>2</sup>

<sup>1</sup> Department of Economics, Marmara University, Istanbul 34722, Turkey

<sup>2</sup> Department of Economics, University of Guelph, Guelph, ON N1G 2W1, Canada

\* Correspondence: pinar.deniz@marmara.edu.tr

## File S1. BMA Analysis—Model Prior Comparisons

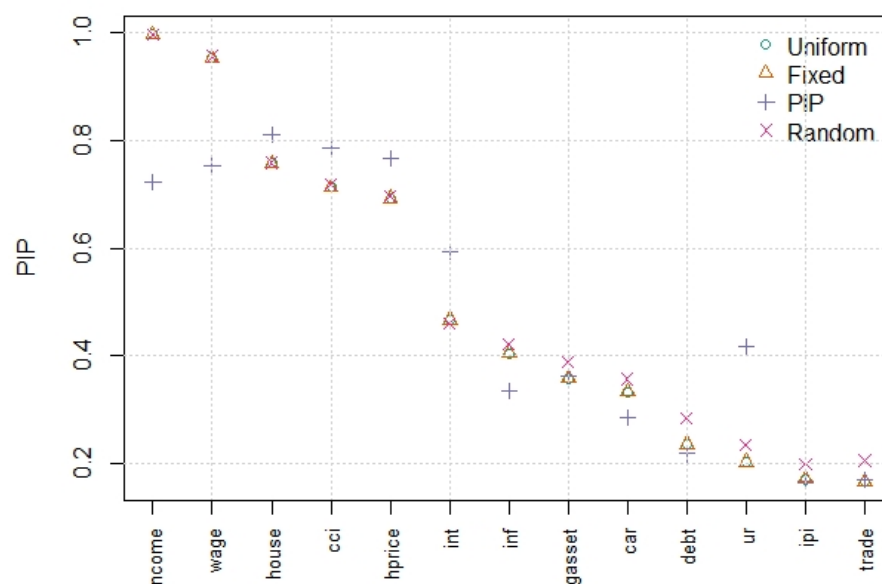

Figure S1. Model prior comparison—club 1.

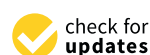

**Citation:** Deniz, P.; Stengos, T. 2023. Supplementary File for Revisiting the Determinants of Consumption: A Bayesian Model Averaging Approach. *Journal of Risk and Financial Management* 16: 190. <https://doi.org/10.3390/jrfm16030190>

Received: 8 February 2023

Revised: 3 March 2023

Accepted: 7 March 2023

Published: 10 March 2023

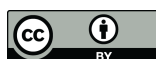

**Copyright:** © 2023 by the authors. Licensee MDPI, Basel, Switzerland. This article is an open access article distributed under the terms and conditions of the Creative Commons Attribution (CC BY) license (<https://creativecommons.org/licenses/by/4.0/>).

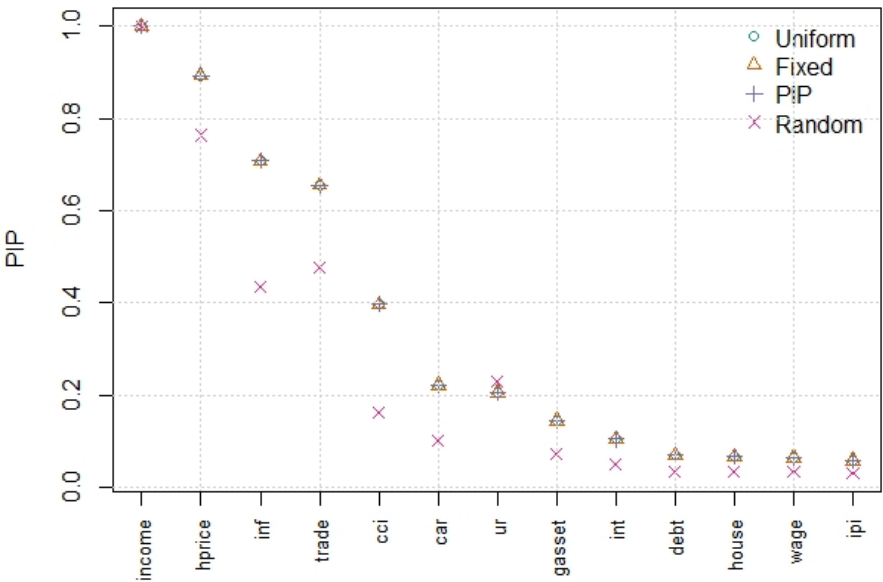

Figure S2. Model prior comparison—club 2.

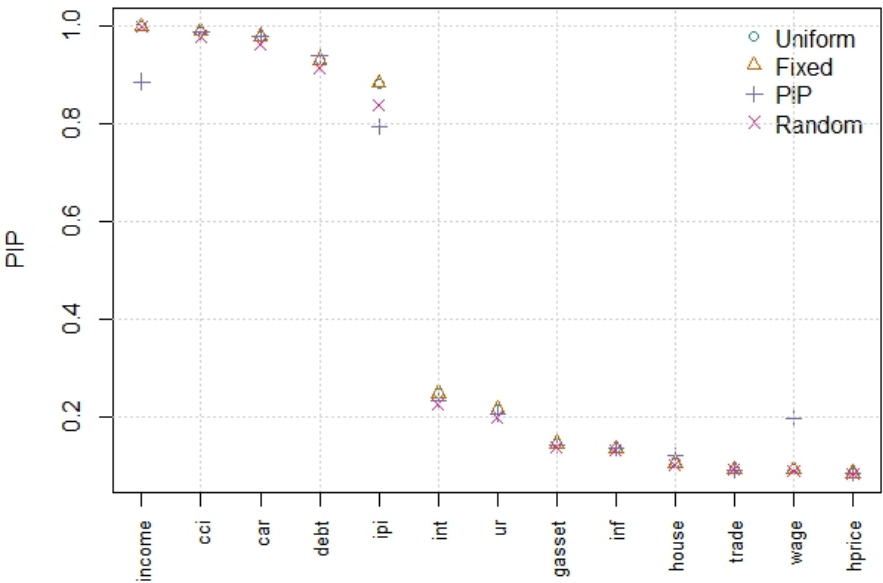

Figure S3. Model prior comparison—club 3.

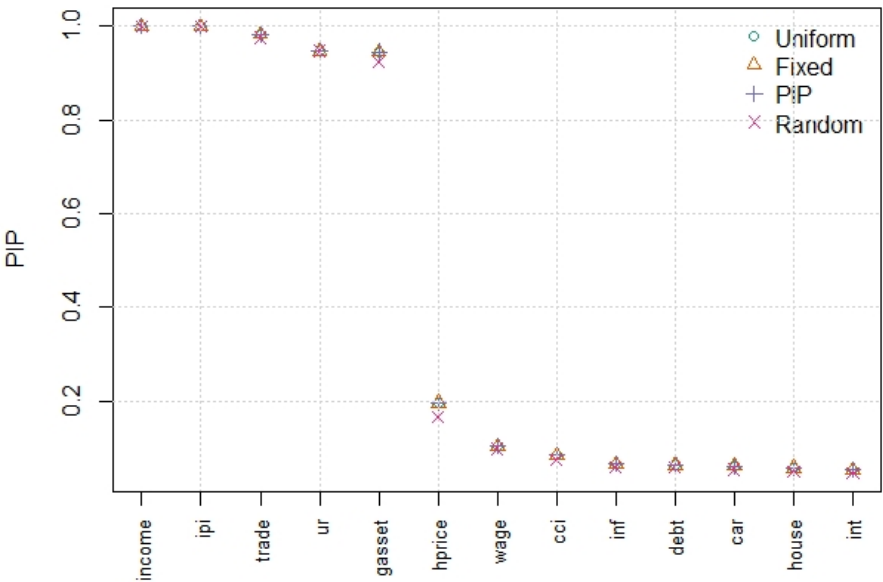

Figure S4. Model prior comparison—club 4.

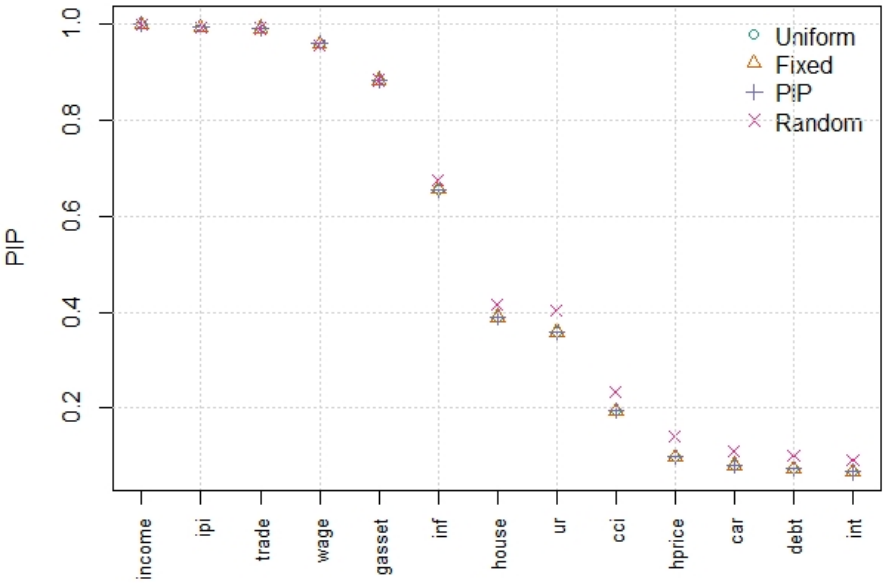

Figure S5. Model prior comparison—club 5.
