# Supplementary material
Source: MDPI journal article supplement (https://www.mdpi.com/1911-8074/16/3/190)

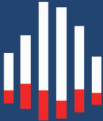

Journal of  
*Risk and Financial  
Management*

Supplement: s1 [file s1]

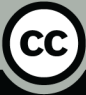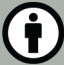

BY

Supplement: s1 [file s1]

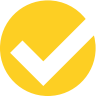

check for  
updates

Supplement: s1 [file s1]
